# Supplementary material for: Prevalence of colistin resistance in clinical isolates of Pseudomonas aeruginosa: a systematic review and meta-analysis
Source: Front Microbiol. 2024 Oct 9;15:1477836. doi: 10.3389/fmicb.2024.1477836 (PMC11520190; doi:10.3389/fmicb.2024.1477836)
Supplement: Supplementary file 1 [file Table_1.XLSX]

## Sheet: Broth microdilution
First Author	Period of collection	Year of collection	Year of publication	Continent	Country	Quality	Number of Isolate	Number of colistin resistance	Method	Origine of sample	Disease	Guideline
Gangwar	Before 2005	2004	2007	Europe	Czech Republic	7	69	0	Broth microdilution	Sputum	CF	CLSI
Kristof		2019 to 2020	2022	Asia	Iran	7	120	4	Broth microdilution			CLSI
Wattal	2016 to 2019	2017 to 2018	2020	Europe	Croatia	7	45	1	Broth microdilution	BAL	Pneumoni	EUCAST
BAYRAM	2016 to 2019	2017	2018	Europe	France	7	8	0	Broth microdilution	Blood		EUCAST
Alhanout	2016 to 2019	2019	2021			8	52	1	Broth microdilution	Blood	Bacteraemia
Caballero	2020 to 2023	2020	2022	Europe	Italy	7	19	0	Broth microdilution	Blood		EUCAST
C. Gomez		2000 to 2018	2020	Europe	Spain	7	382	2	Broth microdilution	Blood	Bacteraemia
Flamm	2016 to 2019	2017 to 2020	2022	Europe	Romania	7	20	2	Broth microdilution	Blood	BSI	CLSI
G. Carvalhaes		2000 to 2008	2012	Europe	Spain	7	709	0	Broth microdilution	Blood	Bacteraemia	CLSI
S. Sader		2003 to 2012	2016	Europe	Greece	8	56	0	Broth microdilution	Blood	BSI	CLSI
S. Sader		2004 to 2017	2019	Europe	Spain	6	190	0	Broth microdilution	Blood	Bacteraemia
Rafalskiy		2006 to 2012	2013	Europe	German	9	113	0	Broth microdilution	Blood	BSI	CLSI
Arif		2010 to 2020	2023	Africa		9	100	32	Broth microdilution	Blood		CLSI
Kresken		2011 to 2016	2017	Asia	South Korea	7	31	0	Broth microdilution	Blood	Bacteraemia	CLSI
Nitescu		2011 to 2018	2019	Asia	India	8	78	1	Broth microdilution	Blood
Blondeau		2013 to 2016	2017	Asia	Turkey	9	14	0+J15+A+A15:N15	Broth microdilution	Blood
Karlowsky		2014 to 2021	2023	Asia	Vietnam	6	49	8	Broth microdilution	Blood	BSI	CLSI
Karlowsky		2014 to 2021	2023			8	92	15	Broth microdilution	Blood		CLSI
Alfouzan		2015 to 2017	2019	North America	USA	8	433	0	Broth microdilution	Blood	BSI	CLSI
Sader		2015 to 2019	2022	Europe	Poland	7	71	0	Broth microdilution	Blood	BSI	EUCAST
Walkty		2015 to 2022	2023	Europe	Greece	6	357	3	Broth microdilution	Blood	BSI	CLSI
Lin	2016 to 2019	2017 to 2019	2022	Asia	Korea	9	488	0	Broth microdilution	Blood	BSI
Tantisiriwat	2016 to 2019	2018 to 2019	2020	Europe	Italy	8	41	2	Broth microdilution	Blood	BSI	EUCAST
Durdu	2016 to 2019	2018 to 2019	2020	Asia	India	7	17	0	Broth microdilution	Blood	BSI
S. Sader		2018 to 2020	2021	Europe	Italy	8	105	13	Broth microdilution	Blood		EUCAST
S. Sader		2019 to 2019	2020	Asia	Taiwan	6	300	5	Broth microdilution	Blood	BSI	CLSI
Maraki		2019 to 2021	2022	Asia	China	7	94	1	Broth microdilution	Blood	BSI	CLSI
Kreskena	2020 to 2023	2020 to 2021	2023	North America	Mexico	9	26	3	Broth microdilution	Blood		CLSI
Hawser			2023	Asia	India	7	4	0	Broth microdilution	Blood	Bacteraemia	CLSI
G. Stone			2019	Asia	Taiwan	7	252	22	Broth microdilution	Blood	BSI	CLSI
Castanheira			2018	Africa	South Africa	9	668	0	Broth microdilution	Blood		CLSI
S. Sader			2019	Asia	Korea	8	3	0	Broth microdilution	Blood		CLSI
Dassner	2020 to 2023	2020	2023	Asia	Iran	7	40	0	Broth microdilution	Burn wound	Burn	CLSI
Perovic		2009 to 2011	2013	Asia	Turkey	9	30	0	Broth microdilution	Burn wound	Burn	CLSI
Feretzakis	2011 to 2015	2014 to 2015	2017	Asia	Iran	9	95	0	Broth microdilution	Burn wound	Burn	CLSI
Walkty	2016 to 2019	2016 to 2019	2021	Africa	Algeria	8	47	0	Broth microdilution	Burn wound	Burn	CLSI
Ergül		2009 to 2013	2017	Asia	Qatar	7	5	0	Broth microdilution	CSF	Meningitis	CLSI
Karlowsky		2019 to 2020	2021	Asia	India	4	59	4	Broth microdilution	Ear discharge	Otitis media
Jean	2016 to 2019	2017 to 2018	2019	Asia	Turkey		29	0	Broth microdilution	Endotracheal aspirate		EUCAST
Pourakbari		2019 to 2021	2022	Asia	Turkey	7	6	1	Broth microdilution	Endotracheal aspirate	COVID-19	EUCAST
Shahri		2019 to 2021	2022	Asia	Turkey	7	19	1	Broth microdilution	Endotracheal aspirate		EUCAST
Stone			2022	Asia	Turkey	8	25	2	Broth microdilution	Endotracheal aspirate		EUCAST
Montero	2011 to 2015	2011	2012	North America	Cuba	7	12	0	Broth microdilution	Etracheal aspirates
Kabic	2011 to 2015	2013 to 2014	2018	Europe	Spain	8	72	0	Broth microdilution	Fecal		CLSI
Aydemir		2006 to 2017	2021	Europe	UK	5	12	1	Broth microdilution	Respiratory		CLSI
Guo	2016 to 2019	2016 to 2019	2020	Asia	Turkey	6	6575	493	Broth microdilution	Respiratory	Lower Respiratory Tract Infections	EUCAST
Yayan		2004 to 2014	2015	Europe	German	7	168	0	Broth microdilution	Respiratory	Pneumoni	CLSI
Depka		2010 to 2016	2019	Europe	Italy	8	188	20	Broth microdilution	Respiratory	CF	EUCAST
Huband		2015 to 2019	2021	Europe	Italy	6	419	18	Broth microdilution	Respiratory	Lower Respiratory Tract Infections	EUCAST
Pfaller	2016 to 2019	2016 to 2018	2020	Nortth America	Mexico	5	49	13	Broth microdilution	Respiratory	CF	CLSI
Zhanel	2016 to 2019	2016 to 2018	2021			4	5332	22	Broth microdilution	Respiratory		EUCAST
Zhanel	2016 to 2019	2016 to 2019	2021	North America	USA	7	4321	13	Broth microdilution	Respiratory	Pneumoni	EUCAST
G. Zhanel	2016 to 2019	2016 to 2019	2021	Europe		7	2507	14	Broth microdilution	Respiratory	Pneumoni	EUCAST
Keepers	2016 to 2019	2018 to 2019	2021			6	273	5	Broth microdilution	Respiratory	CF	CLSI
Farrell	2016 to 2019	2018 to 2019	2020	Asia	Nepal	7	40	0	Broth microdilution	Respiratory	Lower Respiratory Tract Infections	CLSI
Aprile	2020 to 2023	2021 to 2022	2023	Asia	Syria	7	34	14	Broth microdilution	Respiratory	Lower Respiratory Tract Infections	CLSI
S. Sader			2019	Europe		8	53	3	Broth microdilution	Respiratory	Pneumoni	EUCAST
Sader	2011 to 2015	2013	2016	Europe	Spain	8	158	31	Broth microdilution	Sputum	CF	EUCAST
Flamm	2011 to 2015	2014	2016	Europe	German	9	45	17	Broth microdilution	Sputum	CF	EUCAST
Guzek		2002 to 2009	2013	Europe	Spain	8	76	5	Broth microdilution	Sputum	CF	CLSI
Jean	2016 to 2019	2018 to 2019	2022	Asia	Vietnam	6	21	0	Broth microdilution	Sputum	Pneumoni
Sader	2016 to 2019	2018 to 2019	2021	Asia	Iran	7	13	0	Broth microdilution	Sputum	Pneumoni	CLSI
Mendes		2018 to 2022	2023	Asia	China	8	221	0	Broth microdilution	Sputum		CLSI
Lob			2009	Europe	France	7	12	0	Broth microdilution	Sputum	CF	CA-SFM
Arab		2019 to 2021	2022	Europe	Italy	8	16	0	Broth microdilution	Ulcer	Ulcer	EUCAST
Vosahlikova	2016 to 2019	2019	2022	Asia	Pakistan	7	42	3	Broth microdilution	Urine		CLSI
Jansen	2020 to 2023	2020	2023	Asia	Saudi Arabia	9	23	3	Broth microdilution	Urine	UTI	CLSI
Bahçe		2008 to 2017	2019	Europe	Hungary	7	1620	0	Broth microdilution	Urine	UTI	EUCAST
Giacomo		2009 to 2020	2022	North America	Canada	8	63	1	Broth microdilution	Urine	UTI	CLSI
Montesinos		2010 to 2019	2022	Europe	Spain	8	48	0	Broth microdilution	Urine		EUCAST
Lima		2011 to 2019	2020	Europe	Czech Republic	8	1868	0	Broth microdilution	Urine		EUCAST
Costa Ju ́nior		2013 to 2016	2018	Europe	Spain	6	564	45	Broth microdilution	Urine	UTI	CLSI
G. Wise		2015 to 2020	2023	Asia	Korea	8	503	18	Broth microdilution	Urine		CLSI
CHEN	2016 to 2019	2017 to 2017	2019		Russia	6	704	75	Broth microdilution	Urine	UTI
Farrell		2019 to 2020	2021	Asia	India	7	154	30	Broth microdilution	Urine	UTI
Soh	2020 to 2023	2021 to 2022	2022	Asia	Nepal	8	11	0	Broth microdilution	Urine	UTI	CLSI
G. Stone			2020	Asia	India	6	81	0	Broth microdilution	Urine	UTI
Santella		2019 to 2020	2022	Africa	sierra leone	8	75	1	Broth microdilution	Wound		EUCAST
Bandić-Pavlović	Before 2005	2005	2009	Asia	Taiwan	7	164	15	Broth microdilution			CLSI
Ergul	2006 to 2010	2007	2016	Asia	Taiwan	7	78	0	Broth microdilution			CLSI
Yilmaz	2006 to 2010	2008	2011	Europe	Spain	7	190	6	Broth microdilution		BSI	CLSI
Nair	2006 to 2010	2008	2010	North America	Canada	8	373	3	Broth microdilution			CLSI
Pe´rez	2006 to 2010	2009	2011	North America	Canada	7	470	4	Broth microdilution			CLSI
Hsueh	2006 to 2010	2010	2013	North America		7	2722	413	Broth microdilution			CLSI
Viasus	2006 to 2010	2010	2013	Europe	France	7	109	3	Broth microdilution			EUCAST
Morata	2011 to 2015	2011	2013			7	585	0	Broth microdilution			CLSI
El‑Sokkary	2011 to 2015	2011	2014	Europe		7	1185	5	Broth microdilution			EUCAST
M. Darji	2011 to 2015	2012	2014	North America	USA	8	141	1	Broth microdilution		BSI	CLSI
Kim	2011 to 2015	2012	2014	North America	USA	8	82	2	Broth microdilution		IAI	CLSI
Liu	2011 to 2015	2012	2014	North America	USA	8	881	14	Broth microdilution		Pneumoni	CLSI
Bogiel	2011 to 2015	2012	2015	North America	USA	8	100	0	Broth microdilution		Pneumoni	CLSI
Xi	2011 to 2015	2012	2014	North America	USA	8	155	3	Broth microdilution		UTI	CLSI
Cabot	2011 to 2015	2012	2016	North America	USA	8	442	0	Broth microdilution		UTI	CLSI
Golli	2011 to 2015	2012	2014			7	115	2	Broth microdilution			EUCAST
An	2011 to 2015	2012	2015	Asia	China	6	100	5	Broth microdilution			CLSI
Willmann	2011 to 2015	2012	2014	Asia	India	7	153	0	Broth microdilution			CLSI
Tsitsopoulos1	2011 to 2015	2012	2014			7	1019	15	Broth microdilution			CLSI
Lee	2011 to 2015	2012	2016	Asia	Iran	6	45	7	Broth microdilution			CLSI
Licata	2011 to 2015	2013	2013	Asia		7	60	0	Broth microdilution			CLSI
Diekema	2011 to 2015	2014	2015	Africa	Libya	5	11	0	Broth microdilution		Device-associated Nosocomial
Kim	2011 to 2015	2014	2016	North America	USA	7	1743	0	Broth microdilution			CLSI
Ioannou	2016 to 2019	2016	2020	Europe	Greece	8	160	6	Broth microdilution			CLSI
Chaturvedi	2016 to 2019	2016	2018	Nortth America	USA	8	896	3	Broth microdilution			CLSI
Shariati	2016 to 2019	2016	2019	Asia	Taiwan	8	128	0	Broth microdilution			CLSI
Tchakal-Mesbahi	2016 to 2019	2016	2022	Asia	Japan	7	24	0	Broth microdilution			CLSI
Ghasemian	2016 to 2019	2017	2023	Asia	Thailand	8	13	1	Broth microdilution			CLSI
Jauhari	2016 to 2019	2017	2020	Asia	Nepal	8	161	0	Broth microdilution			CLSI
S. Sader	2016 to 2019	2018	2020	Asia	India	7	52	14	Broth microdilution			CLSI
Paprocka	2016 to 2019	2018	2021	Europe	Spain	6	87	12	Broth microdilution			EUCAST
Gherardi	2016 to 2019	2018	2021	Europe		5	570	3	Broth microdilution			EUCAST
Olmos	2016 to 2019	2019	2021	Africa	Egypt	7	3203	659	Broth microdilution			CLSI
Güzel	2020 to 2023	2020	2022			8	2282	9	Broth microdilution			CLSI
Kanwara	2020 to 2023	2020	2023	Asia	Lebanon	4	6	0	Broth microdilution		COVID-19	CLSI
Mustafa	2020 to 2023	2020	2022	Asia	China	6	351	1	Broth microdilution			EUCAST
Pani	2020 to 2023	2021	2023	South America	Peru	7	34	0	Broth microdilution		COVID-19
S.Sader	2020 to 2023	2021	2023	Asia	Nepal	9	36	2	Broth microdilution			EUCAST
Rosales-Reyes	2020 to 2023	2021	2021	Africa	Ethiopia	9	98	6	Broth microdilution			CLSI
Shiralizadeh		2022	2023	Nortth America	Mexico	6	53	4	Broth microdilution			CLSI
Bahçe		2010 to 2015	2019	Europe	Italy	5	3	0	Broth microdilution			EUCAST
Sleiman	2011 to 2015	2013 to 2014	2019	Asia	South Korea	6	23	0	Broth microdilution			CLSI
Zorgani	2016 to 2019	2016 to 2017	2020	South America	Brazil	7	132	1	Broth microdilution			CLSI
Guclu		2019	2023	Asia	Saudi Arabia	9	25	7	Broth microdilution
B. Sherchan		2019 to 2020	2021	Europe		7	302	5	Broth microdilution			EUCAST
Guzek	2020 to 2023	2020 to 2021	2023	Asia	Iran	9	76	27	Broth microdilution			CLSI
Yousef Khan	2020 to 2023	2021 to 2022	2023	South America	Brazil	7	119	4	Broth microdilution
Francesco		1997 to 2016	2019			4	4397	13	Broth microdilution		Pneumoni	CLSI
Cillóniz		1997 to 2016	2019			6	52022	312	Broth microdilution			CLSI
Tran		1997 tor 2016	2019			7	7107	50	Broth microdilution		BSI	CLSI
Mazloomirad		1999 to 2014	2016	Europe	Spain	7	77	7	Broth microdilution		Pneumoni	EUCAST
Flamm		2004 to 2011	2012	Europe	Greece	6	2747	63	Broth microdilution			CLSI
Sader		2004 to 2021	2023	Asia	China	8	1363	42	Broth microdilution			CLSI
Sader		2005 to 2010	2014			7	3434	862	Broth microdilution			CLSI
Sader		2005 to 2015	2016	Europe	Poland	6	332	0	Broth microdilution		Pneumoni	EUCAST
Shortridge	2006 to 2010	2006 to 2007	2011	Asia	Korea	6	215	16	Broth microdilution			CLSI
Cavallo	2006 to 2010	2006 to 2007	2023	Europe	Sweden	6	816	0	Broth microdilution			EUCAST
Saleem	2006 to 2010	2006 to 2009	2011			7	9130	36	Broth microdilution			EUCAST
Petca		2006 to 2012	2016	Europe		8	153	12	Broth microdilution		CF	EUCAST
Berwal		2006 to 2018	2021	Asia	China	7	143	5	Broth microdilution			CLSI
Jimenez-Guerra	2006 to 2010	2007 to 2010	2013	Europe	Italy	7	2797	0	Broth microdilution		Nosocomial	CLSI
Gajdács	2006 to 2010	2007 to 2008	2009	North America	Canada	7	561	6	Broth microdilution			CLSI
Walkty	2006 to 2010	2007 to 2009	2011	North America	Canada	7	1477	19	Broth microdilution			CLSI
Sherchan		2007 to 2011	2013	North America	Canada	8	2183	24	Broth microdilution			CLSI
Alotaibi		2007 to 2012	2018	Nortth America	Canada	8	2435	22	Broth microdilution			CLSI
Dharati		2007 to 2016	2019	Nortth America	Canada	6	3864	193	Broth microdilution			CLSI
Flamm		2007 to 2016	2020	Europe		9	414	29	Broth microdilution			CLSI
Sader		2008 to 2010	2012	South America	Brazil	7	490	3	Broth microdilution
Sader		2008 to 2011	2013	Asia	Vietnam	7	15	0	Broth microdilution			CLSI
Datar		2008 to 2011	2013	Asia	Turkey	9	15	0	Broth microdilution			CLSI
Curiel		2008 to 2011	2012	North America	Canada	9	1549	17	Broth microdilution			CLSI
Xiao Wang		2008 to 2015	2016	Nortth America	Canada	8	2906	148	Broth microdilution			CLSI
Bakht		2008 to 2018	2021	Europe	Romania	7	627	17	Broth microdilution
Piérard		2008 to 2018	2018	Occasion	Australia	8	100	12	Broth microdilution			CLSI
Singh-Moodley		2009 to 2015	2023	South America	Paraguay	5	12	0	Broth microdilution			CLSI
Van An		2009 to 2011	2014	North America		7	678	4	Broth microdilution			CLSI
Carlo		2009 to 2020	2021	Europe	Poland	7	150	3	Broth microdilution		Cancer	EUCAST
Singhal		2010 to 2011	2014	Europe		7	529	3	Broth microdilution			EUCAST
Descours		2010 to 2012	2013	North America	Canada	8	969	16	Broth microdilution			CLSI
Baek		2010 to 2013	2015	Europe	Poland	7	189	0	Broth microdilution		Lower Respiratory Tract Infections	CLSI
Koca		2010 to 2013	2014	Europe	Greece		2252	34	Broth microdilution			CLSI
Bahce		2010 to 2014	2016	Europe	Cyprus	7	186	14	Broth microdilution			CLSI
Ruiz-Roldán		2010 to 2016	2017	Europe	Greece	5	82	1	Broth microdilution			CLSI
Hao		2010 to 2016	2019			6	250	0	Broth microdilution			EUCAST
Jeong		2010 to 2016	2017	Europe	Hungary	8	41	2	Broth microdilution			EUCAST
Hrbacek		2010 to 2018	2021	Asia	China	9	922	84	Broth microdilution			CLSI
Schaumburg	2011 to 2015	2011 to 2012	2013	North America	USA	7	1971	4	Broth microdilution			CLSI
M. Humphries	2011 to 2015	2011 to 2012	2016	Europe	Spain	7	73	1	Broth microdilution			EUCAST
M. Negm	2011 to 2015	2011 to 2021	2023	Asia	Saudi Arabia	9	5534	172	Broth microdilution			CLSI
Camargo	2011 to 2015	2011 to 2012	2014	Asia	Turkey	9	51	0	Broth microdilution			CLSI
Boustanshenas	2011 to 2015	2011 to 2012	2014	Europe		8	2191	4	Broth microdilution			EUCAST
Momenah	2011 to 2015	2011 to 2013	2020	Nortth America	USA	9	28	0	Broth microdilution			CLSI
Tahmasebi	2011 to 2015	2011 to 2014	2015	North America	USA	7	5328	5	Broth microdilution			CLSI
Buzilă	2011 to 2015	2011 to 2015	2017	Nortth America	USA	4	3402	3	Broth microdilution		Pneumoni	EUCAST
Galindo-Méndez	2011 to 2015	2011 to 2015	2019	South America	Brazil	8	88	3	Broth microdilution			CLSI
Kiratisin		2011 to 2017	2019			6	1543	9	Broth microdilution			CLSI
A. Karlowsky	2011 to 2015	2012 to 2013	2017	Asia	South Korea	8	215	16	Broth microdilution			CLSI
Ko	2011 to 2015	2012 to 2013	2018	Asia	Iraq	7	81	3	Broth microdilution			EUCAST
M. Kazmierczak	2011 to 2015	2012 to 2014	2016				7062	35	Broth microdilution			CLSI
Garc«ıa-Fernandez	2011 to 2015	2012 to 2015	2018	Europe		7	3926	16	Broth microdilution			CLSI
Kothari	2011 to 2015	2012 to 2015	2018	Asia	Turkey	9	180	11	Broth microdilution			CLSI
Saleem	2011 to 2015	2012 to 2015	2017	Nortth America	USA	6	3851	4	Broth microdilution			CLSI
Chukamnerd	2011 to 2015	2012 to 2015	2017	Nortth America	USA	6	745	7	Broth microdilution			EUCAST
Saleem		2012 to 2016	2019			7	823	6	Broth microdilution			CLSI
Sa´nchez-Lo´pez		2012 to 2016	2019				11032	419	Broth microdilution			EUCAST
Fournier		2012 to 2017	2018	Asia	China	9	2241	13	Broth microdilution			CLSI
Walkty		2012 to 2018	2020	Asia	Japan	7	25	0	Broth microdilution			CLSI
Hu		2012 to 2018	2020	Europe		9	7503	44	Broth microdilution			CLSI
E. Ibrahim		2012 to 2018	2021	Nortth America	USA	6	6583	39	Broth microdilution			CLSI
Sharma	2011 to 2015	2013 to 2014	2018	Europe	Italy	8	935	145	Broth microdilution			EUCAST
Wi	2011 to 2015	2013 to 2014	2018	Asia	India	8	149	9	Broth microdilution			CLSI
Ullah	2011 to 2015	2013 to 2014	2017			6	3536	32	Broth microdilution
Nguyen	2011 to 2015	2013 to 2014	2016	Nortth America	USA	4	88	0	Broth microdilution		Cancer	CLSI
Addis	2011 to 2015	2013 to 2015	2017			6	1291	0	Broth microdilution			CLSI
Aydın	2011 to 2015	2013 to 2015	2020	Europe	Serbia	8	94	0	Broth microdilution
A. Karlowsky	2011 to 2015	2013 to 2015	2018	Nortth America	USA	8	355	4	Broth microdilution			CLSI
Giani		2013 to 2015	2018	Nortth America	USA	8	489	0	Broth microdilution			EUCAST
Zhang		2013 to 2016	2017	Nortth America	USA	6	7868	31	Broth microdilution			CLSI
Bian		2013 to 2018	2022	Europe		5	2741	35	Broth microdilution
Wang		2013 to 2019	2022	Asia	Malaysia	7	274	12	Broth microdilution			EUCAST
E. Falagas	2011 to 2015	2014 to 2015	2018			6	103	2	Broth microdilution			EUCAST
Galani	2011 to 2015	2014 to 2015	2019	Europe	Cyprus	7	113	15	Broth microdilution			CLSI
Banerjee	2011 to 2015	2014 to 2015	2018	Asia	Turkey	9	205	18	Broth microdilution			CLSI
Babu	2011 to 2015	2014 to 2015	2018	Europe	German	8	497	1	Broth microdilution			EUCAST
Pragsam	2011 to 2015	2014 to 2015	2019			7	1301	66	Broth microdilution			CLSI
Veeraraghavan		2014 to 2016	2017	Asia	Turkey	5	16	2	Broth microdilution		Pneumoni	CLSI
Chauhan		2014 to 2016	2017	Nortth America	USA	8	5	0	Broth microdilution		CF	CLSI
Salimizand		2014 to 2016	2018	Asia	India	7	308	15	Broth microdilution			CLSI
Hishinuma		2014 to 2016	2020	Nortth America	USA	8	1385	6	Broth microdilution			CLSI
Franco		2014 to 2017	2021			6	1953	51	Broth microdilution			CLSI
Jung		2014 to 2018	2020	Nortth America	USA	3	3193	10	Broth microdilution		Pneumoni
Huang		2014 to 2018	2021	Europe	France	7	341	4	Broth microdilution			EUCAST
Çiçek		2014 to 2018	2021	Europe	Italy	7	367	3	Broth microdilution			EUCAST
Moubareck		2014 to 2018	2020	Europe	Spain	6	6	0	Broth microdilution			CLSI
Aruhomukama		2014 to 2018	2021	Europe	UK	7	347	4	Broth microdilution			ISO
Monogue		2014 to 2019	2021	Europe		8	3567	21	Broth microdilution		Pneumoni	CLSI
Holger		2014 to 2019	2022	Nortth America	USA	9	118	6	Broth microdilution			CLSI
R. Evans		2015 to 2015	2017	Europe	Turkey	6	15	0	Broth microdilution		Pneumoni	CLSI
Shortridge		2015 to 2015	2021	Europe		7	420	6	Broth microdilution			EUCAST
A. Karlowsky		2015 to 2016	2018	Asia	India	8	23	0	Broth microdilution			CLSI
Shortridge		2015 to 2016	2021	Asia	Turkey	9	70	0	Broth microdilution			CLSI
Pfaller		2015 to 2016	2019	Asia	UAE	8	37	0	Broth microdilution			CLSI
Kohira		2015 to 2016	2017	Nortth America	USA	6	44	0	Broth microdilution			CLSI
Zhu		2015 to 2016	2018	Nortth America	USA	8	12170	121	Broth microdilution			CLSI
Naas		2015 to 2016	2019	Europe		7	921	6	Broth microdilution			CLSI
Appalaraju		2015 to 2016	2019	North America		7	679	1	Broth microdilution			CLSI
Stracquadanio		2015 to 2016	2021	South America	Brazil	7	99	0	Broth microdilution			EUCAST
Brzozowski		2015 to 2016	2018	Europe	Switzerland	8	4175	41	Broth microdilution
Fraenkel		2015 to 2016	2019	Europe	German	5	81	5	Broth microdilution
Gajdács		2015 to 2017	2020			7	2032	6	Broth microdilution			EUCAST
Seifert		2015 to 2017	2021	Asia	China	9	11	0	Broth microdilution			CLSI
Lin		2015 to 2017	2019	Africa	Uganda	9	1077	0	Broth microdilution			CLSI
Milojković		2015 to 2017	2020			6	18003	88	Broth microdilution			CLSI
A. Sid Ahmed		2015 to 2017	2020	Europe	Poland	8	202	6	Broth microdilution			EUCAST
Negm		2015 to 2017	2019	Asia	China	6	736	2	Broth microdilution			CLSI
Lai		2015 to 2017	2020	Nortth America	USA	8	6836	16	Broth microdilution			CLSI
Tada		2015 to 2017	2018	Nortth America	USA	8	1827	1	Broth microdilution			CLSI
Sader		2015 to 2017	2020	Europe		6	6156	31	Broth microdilution			EUCAST
Jean		2015 to 2017	2020			6	2035	16	Broth microdilution			EUCAST
Korzekwa		2015 to 2020	2023	North America	USA	9	300	8	Broth microdilution		CF	EUCAST
Sader		2015 to 2020	2023			6	4614	19	Broth microdilution			CLSI
Shortridge	2016 to 2019	2016 to 2017	2020	Europe	German	9	542	9	Broth microdilution			EUCAST
Sader	2016 to 2019	2016 to 2017		Europe	Spain	7	80	4	Broth microdilution
Sader	2016 to 2019	2016 to 2018	2018	Asia	Saudi Arabia	8	10	3	Broth microdilution			CLSI
Tekin	2016 to 2019	2016 to 2016	2020	South America	Brazil	7	65	0	Broth microdilution
Shortridge	2016 to 2019	2016 to 2017	2020	Asia	India	4	23	3	Broth microdilution		Burn	CLSI
Bahabri	2016 to 2019	2016 to 2017	2022	Asia		5	150	4	Broth microdilution			EUCAST
Doumith	2016 to 2019	2016 to 2017	2018	Europe	Switzerland	8	785	50	Broth microdilution
HENDERSON	2016 to 2019	2016 to 2017	2020	South America	Brazil	6	265	3	Broth microdilution			CLSI
Tuon	2016 to 2019	2016 to 2017	2018	Europe	Spain	9	58	4	Broth microdilution			EUCAST
Beirão	2016 to 2019	2016 to 2017	2022	Europe	German	7	383	1	Broth microdilution			EUCAST
Oliveira Santos	2016 to 2019	2016 to 2018	2021	Asia	Taiwan	6	199	0	Broth microdilution		IAI
Walkty	2016 to 2019	2016 to 2018	2019	Asia	India	8	140	28	Broth microdilution			EUCAST
Walkty	2016 to 2019	2016 to 2018	2022	Asia		7	376	3	Broth microdilution			EUCAST
Karlowskya	2016 to 2019	2016 to 2018	2022	Asia	Korea	7	296	1	Broth microdilution
Zhanel	2016 to 2019	2016 to 2018	2020	Europe	Poland	7	49	1	Broth microdilution
Idowu	2016 to 2019	2016 to 2019	2022	Europe		6	2191	11	Broth microdilution
Chen	2016 to 2019	2016 to 2020	2023	Nortth America	Canada	7	1256	3	Broth microdilution			CLSI
Liu	2016 to 2019	2017 to 2017	2018			6	1909	2	Broth microdilution			CLSI
Ekkelenkamp	2016 to 2019	2017 to 2018	2020	Asia	Iran	8	101	4	Broth microdilution			CLSI
Nelly	2016 to 2019	2017 to 2018	2019	Europe	Greece	7	1784	63	Broth microdilution			CLSI
Samonis	2016 to 2019	2017 to 2018	2022	Asia	Saudi Arabia	7	50	2	Broth microdilution			CLSI
Rajenderan	2016 to 2019	2017 to 2019	2022	Asia	China	8	517	7	Broth microdilution			CLSI
Abavisani	2016 to 2019	2017 to 2019	2019	Asia	China	9	50	1	Broth microdilution			CLSI
Kurihara		2017 to 2020	2023			8	29746	268	Broth microdilution			EUCAST
Lee		2017 to 2020	2023	Europe		8	603	1	Broth microdilution			EUCAST
Alfouzan		2017 to 2021	2023	Europe		5	823	2	Broth microdilution			EUCAST
Yadav		2017 to 2022	2023	Africa		7	1109	1	Broth microdilution			EUCAST
Delgado-Valverde	2016 to 2019	2018 to 2019	2022	Asia	Saudi Arabia	8	635	24	Broth microdilution			CLSI
Simar	2016 to 2019	2018 to 2019	2023	Asia	Pakistan	8	209	30	Broth microdilution			CLSI
Shortridge	2016 to 2019	2018 to 2019	2022	Asia	Iran	6	97	9	Broth microdilution			CLSI
Shortridge		2018 to 2020	2021	Europe	Romania	4	15	0	Broth microdilution		UTI	EUCAST
Asempa		2018 to 2020	2023	Europe		8	568	2	Broth microdilution			EUCAST
Gaudereto		2018 to 2020	2022	Africa	Morocco	8	321	1	Broth microdilution			EUCAST
Shortridge		2018 to 2021	2023	Europe	Serbia	9	320	1	Broth microdilution			EUCAST
Karlowsky		2018 to 2022	2023	Asia	China	7	4391	88	Broth microdilution			CLSI
Karlowsky		2018 to 2022	2023	Europe	Romania	8	298	20	Broth microdilution			EUCAST
Morrow		2019 to 2020	2021	Asia	Vietnam	6	121	1	Broth microdilution			EUCAST
S. Sader		2019 to 2019	2020	South America	Brazil	8	34	0	Broth microdilution			CLSI
W. Nichols		2019 to 2019	2023	Asia	Iran	7	9	0	Broth microdilution			CLSI
Jones		2019 to 2019	2023	Asia	China	7	522	94	Broth microdilution			EUCAST
Shortridge		2019 to 2020	2021	Asia	Iran	9	70	12	Broth microdilution			CLSI
Farrell		2019 to 2020	2023	Asia	Egypt	9	4829	377	Broth microdilution
Hu		2019 to 2021	2021	Asia	Turkey	8	14	1	Broth microdilution		COVID-19	EUCAST
Hu		2019 to 2021	2023	Asia	China	7	13	0	Broth microdilution		diabetic	CLSI
RUH		2019 to 2021	2022	Asia	Taiwan	8	50	0	Broth microdilution			CLSI
Ece		2019 to 2022	2023	Asia	India	9	100	9	Broth microdilution			CLSI
Huband	2020 to 2023	2020 to 2021	2023	Asia	Iran	9	15	2	Broth microdilution		COVID-19	CLSI
Fournier	2020 to 2023	2020 to 2021	2022	Asia	Saudi Arabia	8	9	0	Broth microdilution		UTI	CLSI
Mulet	2020 to 2023	2021 to 2022	2022	Asia	India	8	348	20	Broth microdilution			CLSI
Díaz-Cañestro			2019	Europe	Newcastle	4	4	0	Broth microdilution		Respiratory infections	CLSI
Gajdács			2018	Asia	Taiwan	3	100	5	Broth microdilution		Bacteraemia	CLSI
Jones			2008	Asia	Turkey	6	50	1	Broth microdilution		CF	CLSI
Sader			2022	Europe	Italy	4	12	2	Broth microdilution		CF
Nitz			2022	Asia	India	8	143	9	Broth microdilution			CLSI
Jones			2018	Nortth America	USA	8	4	0	Broth microdilution			CLSI
Thelen			2020			8	116	10	Broth microdilution			CLSI
Juhász			2018			5	197	4	Broth microdilution			CLSI
Burgh			2019	Asia	China	8	30	3	Broth microdilution
Karlowsky			2023	Asia	Qatar	6	164	0	Broth microdilution
Mikucionyte			2021	Europe	Poland	8	10	0	Broth microdilution			EUCAST
G. Wise			2020	Nortth America	Canada	8	14	0	Broth microdilution			CLSI
Pfaller			2011	Africa	Egypt	8	15	4	Broth microdilution			CLSI
Krause			2018	Asia	Kuwait	7	48	1	Broth microdilution			CLSI
Gales			2022	Asia	Thailand	7	100	4	Broth microdilution			CLSI
Matuschek			2014	North America	USA	7	18	0	Broth microdilution			CLSI
Sader			2020	Nortth America	USA	8	10	0	Broth microdilution			CLSI
Gant			2022	Asia	China	7	37	0	Broth microdilution			CLSI
Gales			2020	Europe	German	7	54	6	Broth microdilution			EUCAST
Gales			2020	Europe	Spain	6	506	29	Broth microdilution			EUCAST
Gales			2021	Europe		7	54	0	Broth microdilution			EUCAST
Asar			2019			6	3818	11	Broth microdilution			EUCAST
Bae			2013	Asia	China	7	221	1	Broth microdilution			EUCAST
Gales			2018	Europe	Sweden	7	21	0	Broth microdilution
Depka				South America	Argentina		234	0	Broth microdilution
Candel				South America	Chile		177	0	Broth microdilution
Canton				North America	Mexico		198	0	Broth microdilution

## Sheet: Drug Resistance Categories
First Author	Year of collection	Year of publication	Continent	Country	Quality	Number of colistin resistance	Method	Guideline	Carbapenem-Resistant	MDR	XDR
E. M. Badawy		2023			4	1	Broth microdilution	CLSI	2
Chen	2019 to 2019	2022	Asia	China	6	3	Broth microdilution	EUCAST	6
Soliman	2014	2019	Africa	Egypt	8	0	Broth microdilution	EUCAST	7
Perez	2012 to 2013	2014	North America	USA	7	2	Broth microdilution	CLSI	7
Kazmierczak	2012 to 2014	2015			6	0	Broth microdilution	CLSI	12
W. Alruways	2021 to 2022	2023	Asia	Saudi Arabia	7	0	Broth microdilution	CLSI	12
Martínez		2012	North America	USA	5	2	Broth microdilution		12
Chen	2020 to 2022	2023	Asia	China	5	0	Broth microdilution	CLSI	15
Brauncajs	2021 to 2022	2022	Europe	Poland	7	2	Broth microdilution	EUCAST	15
Dias	2013 to 2013	2017	America	Brazil	6	0	Broth microdilution	CLSI	19
Ruekit	2017 to 2018	2022	Asia	Thiland	7	0	Broth microdilution	EUCAST	19
Al-Bayssari	2018 to 2019	2021	Asia	Lebanon	6	0	Broth microdilution	EUCAST	20
Balkhair	2017 to 2020	2023	Asia	Oman	6	1	Broth microdilution	CLSI	21
Ramadan	2017 to 2017	2018	Asia	Egypt	6	2	Broth microdilution	CLSI	22
Sacha	2012 to 2013	2015	Europe	Poland	7	0	Broth microdilution	EUCAST	25
Gunalan		2021	Asia	India	5	5	Broth microdilution		25
Abubakar	2018 to 2020	2022	Asia	Malaysia	6	0	Broth microdilution	CLSI	28
Hu	2009 to 2018	2021	Asia	China	8	1	Broth microdilution	CLSI	30
Priyadarshi	2020 to 2021	2023	Asia	India	5	1	Broth microdilution	CLSI	30	30
Chew	2015 to 2018	2019	Asia	Singapore	7	0	Broth microdilution	EUCAST	31
Khater	2021 to 2022	2022	Asia	Saudi Arabia	8	10	Broth microdilution	CLSI	32
Sh. Khater	2021 to 2022	2022	Asia	Saudi Arabia	8	10	Broth microdilution	CLSI	32
Ferjani	2014 to 2017	2022	Africa	Tunisia	8	0	Broth microdilution	CLSI	35
A. Al-Zahrani		2020	Asia	Saudi Arabia		3	Broth microdilution	EUCAST	35
Ali	2019 to 2019	2021	Asia	Egypt	8	13	Broth microdilution	CLSI	36
Wi		2018	North America	USA	7	0	Broth microdilution	CLSI	42
Gales	2002	2003	South America	Brazil	6	0	Broth microdilution	CLSI	43
Takahashi	2018 to 2020	2021	Asia	Nepal	8	8	Broth microdilution	CLSI	43
Ejaz		2022	Asia	Saudi Arabia	8	0	Broth microdilution	CLSI	47
Huang	2020 to 2021	2022	Asia	Taiwan	7	0	Broth microdilution	CLSI	50
Wu	2017 to 2020	2022	Asia	China	7	1	Broth microdilution	EUCAST	54
Katchanov	2015 to 2016	2018	Europe	Germany	4	5	Broth microdilution	EUCAST	63
Vamsi	2022	2023	Asia	India	6	10	Broth microdilution		63
VÁZQUEZa	2016	2020	Europe	Spain	7	3	Broth microdilution	EUCAST	71
Kuo		2021	Asia	Taiwan	6	3	Broth microdilution	EUCAST	81
HOŞBUL	2016 to 2021	2022	Asia	Turkey	8	0	Broth microdilution	CLSI	100
Hishinuma	2012 to 2016	2018	Asia	Japan	6	0	Broth microdilution	CLSI	104
Heijden	1998 to 2003	2007	South America	Brazil	7	0	Broth microdilution		109
LI	2017 to 2021	2022	Asia	China	8	5	Broth microdilution	CLSI	110
Heidari	2020 to 2021	2022	Asia	Iran	7	4	Broth microdilution	CLSI	115
Anderson	2016 to 2018	2022	America	USA	8	4	Broth microdilution	EUCAST - CLSI	116
Rizek		2014	South America	Brazil	8	1	Broth microdilution		129
C. Papagiannitsis	2015 to 2015	2017	Europe	Czech	7	5	Broth microdilution	EUCAST	136
Zhu		2021	Asia	China	7	0	Broth microdilution	CLSI	151
García-Castillo		2011	Europe	Spain	6	1	Broth microdilution	EUCAST	175
Rossolini	2004	2008	Europe	Italy	7	0	Broth microdilution	CLSI	222
Lin	2000 to 2010	2016	Asia	Taiwan	6	21	Broth microdilution	CLSI	349
Walters	2015	2019	North America		6	129	Broth microdilution	CLSI	384
Zhao	2017 to 2020	2023	Asia	China	8	4	Broth microdilution	CLSI	416
G. McCracken	2007 to 2016	2019	America	Canada	7	28	Broth microdilution	CLSI	466
McCracken	2007 to 2016	2019	North America	Canada	8	38	Broth microdilution	CLSI	466
Rout	2020 to 2022	2023	Asia	India	9	117	Broth microdilution	CLSI	731
Rout	2020 to 2022	2023	Asia	India	9	126	Broth microdilution	CLSI	731
Kiratisin	2016 to 2018	2021			7	1	Broth microdilution	EUCAST	784
Lee	2012 to 2021	2023	Asia	Taiwan	7	240	Broth microdilution	CLSI	13385
Valenza	2006	2007	Europe	Germany	8	1	Broth microdilution	CLSI	17 (MBL)
A. Sid Ahmed	2014 to 2017	2021	Asia	Qatar	7	0	Broth microdilution	CLSI		16
Armengo		2020	Europe	Spain	3	0	Broth microdilution	EUCAST		7
Armengol		2019	Europe	Spain	5	0	Broth microdilution	EUCAST		7
Bunsow	2013 to 2016	2019	Europe	Spain	7	0	Broth microdilution	CLSI		3
Chowdhury	2006 to 2007.	2016	Oceania	Australia	8	0	Broth microdilution	CLSI			3
Flores-Paredes	2009 to 2010 and 2012 to 2014	2021	America	Peru		0	Broth microdilution	CLSI
Ghasemshahi	2020	2022	Asia	Iran	8	0	Broth microdilution	CLSI
Giacomo	2020	2022	Europe	Rome	7	0	Broth microdilution	EUCAST			13
Juhasz	2013 to 2014	2017	Europe	Hungary	5	0	Broth microdilution	EUCAST		20
Karruli	2021 to 2022	2022	Europe	Italy	7	0	Broth microdilution	ISO
KhAjuriA	2011 to 2012	2013	Asia	India	7	0	Broth microdilution
Longshaw	2014 to 2016	2020	Europe		6	0	Broth microdilution	EUCAST		177
Mellouli	2010 to 2017	2021	Africa	Tunisia	6	0	Broth microdilution	CASFM		9
Mickymaray		2019	Asia	Saudi Arabia	5	0	Broth microdilution	EUCAST		1
Peña	2006	2012	Europe	Spain	7	0	Broth microdilution	EUCAST		151
ŞANAL		2016	Asia	Turkey	7	0	Broth microdilution	CLSI		30
Sendra	2010 to 2019	2022	Europe	Spain	9	0	Broth microdilution	EUCAST			101
Sid Ahmed	2014 to 2017	2021	Africa	Qatar	7	0	Broth microdilution	CLSI		16
Tada	2015 to 2017	2019	Asia	Myanmar	9	0	Broth microdilution	CLSI		45
Viedma	2007 to 2010	2012	Europe	Spain	7	0	Broth microdilution	CLSI		104
Wendel	2015 to 2020	2022	Europe	Germany	8	0	Broth microdilution	EUCAST		54
A. Hackel	2014 to 2016	2017			6	1	Broth microdilution	CLSI		262
A. Hakeam	2018 to 2021	2022	Asia	Saudi Arabia	5	1	Broth microdilution	CLSI			16
Akgul		2021	Asia	Turkey	4	1	Broth microdilution			1
ARICI	2019 to 2022	2023	Asia	Turkey	7	1	Broth microdilution	CLSI		48
Holger		2023	North America	USA	7	1	Broth microdilution	CLSI		10
Montero		2019	Europe	Spain	7	1	Broth microdilution	CLSI			20
Montero		2020	Europe	Spain	7	1	Broth microdilution	CLSI			24
Santimaleeworagun	2017 to 2018	2020	Asia	Thailand	7	1	Broth microdilution	CLSI		64
Yilmaz	2019 to 2020	2023	Asia	Turkey	8	2	Broth microdilution	CLSI		6
Din	2018 to 2018	2023	Asia	Pakistan	5	3	Broth microdilution	CLSI			8
Janet	2010 to 2011	2013	North America	USA	6	3	Broth microdilution	CLSI		60
Li	2013 to 2018	2021	Asia	China	7	3	Broth microdilution	EUCAST		534
Barrio-Tofiño	2015 to 2015	2017	Europe	Spain	5	4	Broth microdilution	EUCAST			150
B. Ford	2009 to 2014	2022	America	USA	5	7	Broth microdilution	CLSI		43
Divisio	2014 to 2015	2019	Asia	Qatar	8	7	Broth microdilution	CLSI		205
Maraki	2004 to 2009	2012	Europe	Greece	7	7	Broth microdilution	CLSI		118
V. I. Rolston	2014 to 2017	2020	America	USA	3	8	Broth microdilution	CLSI/FDA		32
A. Sid Ahmed	2014 to 2017	2022	Asia	Qatar	8	10	Broth microdilution	CLSI		395
Meschiari	2017 to 2019	2021	Europe	Italy	9	10	Broth microdilution	EUCAST		111
A. Sid Ahmed	2014 to 2017	2020	Asia	Qatar	6	13	Broth microdilution	CLSI		424
Bagheri-Nesami	2014 to 2015	2017	Asia	Iran	5	13	Broth microdilution	CLSI		21
Badierah	2016	2019	Asia	saudi Arabia	4	14	Broth microdilution			16
Soni		2023	Asia	India	8	19	Broth microdilution	CLSI		384
Mataraci Kara	2017 to 2017	2020	Asia	Turkey	6	27	Broth microdilution	CLSI		40
A. Sid Ahmed	2014 to 2015	2019	Asia	Qatar	9	188	Broth microdilution	CLSI		205
Kragh	2016 to 2017	2021	Europe	Italy	8	1	Broth microdilution	EUCAST		3
Maina	2022 to 2022	2023	Africa	Kenya	9	1	Broth microdilution	CLSI		13
Vergé	2015 to 2017	2018	Europe	Germany	9	35	Broth microdilution	CLSI			38
Sua ́rez	2018 to 2019	2021	Europe	Spain	9	0	Broth microdilution	EUCAST		4
Espejo		2020	Europe	Spain	9	1	Broth microdilution	CLSI		7
Ullah		2023	Asia	UAE	8	6	Broth microdilution	CLSI		26
Manohar	2014 to 2015	2017	Asia	India	7	3	Broth microdilution	CLSI		10
Jalali	2019 to 2020	2021	Europe	Slovakia	5	2	Broth microdilution	EUCAST		16
Proevska	2017 to 2018	2021	Europe	Bulgaria	7	3	Broth microdilution			21
MacKenzie		2004	Europe	UK	6	23	Broth microdilution	NCCLS		59
Çetin	2015 to 2021	2022	Asia	Turkey	8	30	Broth microdilution	EUCAST		121
Domenico	2013 to 2015	2017	Europe	Italy	6	0	Broth microdilution	EUCAST		5
Chauhan	2021 to 2022	2022	Asia	India	7	17	Broth disk elution	CLSI		110

## Sheet: AST methods 
First Author	Year of collection	Year of publication	Continent	Country	Quality	Number of Isolate	Number of colistin resistance	Method
Fang	2021 to 2021	2023	Asia	China		1	0	Agar dilution
Taylor	2016 to 2016	2021	Europe		3	2	0	Agar dilution
A. Baiomy		2023	Asia	Egypt	3	3	3	Agar dilution
BhoNgle	2008 to 2010	2012	Asia	India	8	29	1	Agar dilution
Al-Agamy	2011	2016	Asia	Saudi Arabia	8	34	1	Agar dilution
J. Nolan	2015 to 2018	2020	America	USA	3	42	2	Agar dilution
Picao	2005	2009	South America	Brazil	7	43	0	Agar dilution
Aguilar-Rodea	2007 to 2013	2017	North America	Mexico	5	46	5	Agar dilution
GARCÉs	1996 to 2006	2009	Europe	Spain	6	50	20	Agar dilution
Tan	2004	2006	Asia	Singapore	6	56	15	Agar dilution
Fluge	1994 to 1998	2001	Europe	Norway	7	65	0	Agar dilution
El-Baky		2020	Asia	Egypt	5	75	16	Agar dilution
V. Mallikarjuna	2021 to 2021	2022	Asia	India	8	80	34	Agar dilution
Rahimi	2019 to 2020	2021	Asia	Iran	7	85	7	Agar dilution
Goli	2014 to 2014	2016	Asia	Iran	8	100	2	Agar dilution
Tiengrim	2016 to 2016	2017	Asia	Thailand	4	203	0	Agar dilution
Morosini	2002 to 2004	2005	Europe	Spain	7	206	6	Agar dilution
CHEN	2015 to 2017	2020	Asia	China	8	262	74	Agar dilution
Schülin	1998 to 1999	2002	Europe	Germany	7	385	40	Agar dilution
Sparrow	2000	2003	Europe	UK	6	428	13	Agar dilution
Hansen	1989 to 2003	2008	Europe	Denmark	7	1093	0	Agar dilution
Livermore	2011 to 2015	2017	Europe	UK	7	1414	63	Agar dilution
Sheth	2010 to 2011	2012	Asia	India	6	1	0	Disc diffusion
Aiyegoro	2005 to 2006	2007	Africa	Nigeria	6	1	0	Disc diffusion
Pathania	2013	2014	Asia	India	7	2	1	Disc diffusion
KAUSHAL	2010 to 2011	2012	Asia	India	6	2	1	Disc diffusion
Subbaraju	2007 to 2013	2018	Asia	India	8	2	0	Disc diffusion
Gahlot		2021	Asia	India	6	3	0	Disc diffusion
BASU1	2012	2012	Asia	India	6	4	0	Disc diffusion
Raza	2015 to 2017	2019	Asia	India	7	4	0	Disc diffusion
R. Mishra		2020	Asia	Nepal	2	4	0	Disc diffusion
F. Ama´bile-Cuevas		2017	America	Mexico	4	4	0	Disc diffusion
Alexopoulou	2012 to 2014	2016	Europe	Greece	7	5	0	Disc diffusion
Vasudeva	2014 to 2015	2016	Asia	India	8	5	1	Disc diffusion
Rattanaumpawan	2007 to 2008	2013	Asia	Thailand	7	5	4	Disc diffusion
Chaudhary	2017 to 2019	2020	Asia	Nepal	4	5	0	Disc diffusion
Tohamy	2015 to 2016	2018	Asia	Egypt	6	6	2	Disc diffusion
Kokkayil	2014	2018	Asia	India	6	7	0	Disc diffusion
Ebadati		2023	Asia	Iran	6	7	0	Disc diffusion
KC	2017 to 2018	2019	Asia	Nepal	7	7	1	Disc diffusion
Kokkayil	2014	2018	Asia	India	5	7	0	Disc diffusion
Ebadati		2023	Asia	Iran	7	8	0	Disc diffusion
Ramanathan	2009 to 2010	2017	Asia	Malaysia	5	10	6	Disc diffusion
Farag	2016 to 2017	2020	Asia	Egypt	6	11	0	Disc diffusion
Thapa	2019 to 2020	2023	Asia	Nepal	6	12	0	Disc diffusion
Azimi	2011	2012	Asia	Iran	7	12	0	Disc diffusion
Ejaz	2016 to 2019	2020	Asia	Pakistan	8	12	0	Disc diffusion
Thapa	2019 to 2020	2023	Asia	Nepal	6	12	0	Disc diffusion
Goli	2015	2018	Asia	Iran	8	15	0	Disc diffusion
Mordi		2006	Africa	Nigeria	6	16	7	Disc diffusion
Vecchi	2010	2013	Europe	Italy	7	18	0	Disc diffusion
N. Gaber	2017 to 2018	2020	Asia	Egypt	5	18	0	Disc diffusion
eid	2017 to 2018	2020	Asia	Egypt	9	18	0	Disc diffusion
Shabban	2019	2020	Europe	Egypt	8	19	2	Disc diffusion
Mohamed	2019 to 2021	2022	Africa	Somalia	6	19	3	Disc diffusion
A. I. Abdelatti	2020 to 2022	2023	Asia	Egypt	8	21	9	Disc diffusion
SEALE		1979	North America	USA	7	21	0	Disc diffusion
VALENZA	2004 to 2008	2010	Europe	Germany	7	22	0	Disc diffusion
Karimzadeh	2013 to 2015	2017	Asia	Iran	5	22	0	Disc diffusion
Lakhal	2013 to 2014	2021	Europe	France	8	22	0	Disc diffusion
Baidya	2019 to 2020	2021	Oceania	Australia	8	22	0	Disc diffusion
Moradi	2019 to 2020	2021	Asia	Iran	6	22	0	Disc diffusion
Jehad Ismail		2018	Asia	Iraq	6	22	4	Disc diffusion
Dadmanesh1	2013	2014	Asia	Iran	7	23	5	Disc diffusion
Yamada		2011	Asia	Japan	8	24	0	Disc diffusion
Chittawatanarat		2014	Asia	Thailand	5	25	0	Disc diffusion
Akhi		2015	Asia	Iran	5	26	0	Disc diffusion
Safain	2015 to 2019	2021	America	USA	8	26	3	Disc diffusion
Mohamed	2018 to 2020	2021	Africa	Somalia	6	27	3	Disc diffusion
Pujji	2017 to 2017	2019	Asia	Nepal	3	28	12	Disc diffusion
Averbuch	2014 to 2015	2017	Europe	Poland	8	29	1	Disc diffusion
Meradji	2014 to 2015	2016	Africa	Algeria	7	30	9	Disc diffusion
Gilani	2014	2015	Asia	Turkey	5	30	6	Disc diffusion
El mekes	2015 to 2016	2019	Africa	Morocco	7	30	0	Disc diffusion
Eftekhar	2004 to 2005	2009	Asia	Iran	7	31	4	Disc diffusion
VALENZA	2010 to 2011	2015	Europe	Germany	6	31	0	Disc diffusion
Ahmed		2022	Asia	Pakistan	6	32	0	Disc diffusion
Laurentiu	2014 to 2015	2017	Europe	Romania	6	33	0	Disc diffusion
Medell	2011	2013	North America	Cuba	6	34	0	Disc diffusion
Mubarak	2019 to 2020	2021	Asia	Iraq	6	35	12	Disc diffusion
Mohammadzamania	2018 to 2018	2019	Asia	Iran	3	35	0	Disc diffusion
Makharita		2020	Asia	Egypt	8	36	2	Disc diffusion
Rashid	2007 to 2008	2014	Asia	Pakistan	6	37	0	Disc diffusion
Emami	2015 to 2016	2017	Asia	Iran	6	38	5	Disc diffusion
lila	2014	2020	Europe	Kosovo	7	40	38	Disc diffusion
Poudineh	2019 to 2019	2020	Asia	Iran	8	40	3	Disc diffusion
Agrawal		2013	Asia	India	7	41	0	Disc diffusion
Olowo-okere		2020	Africa	Nigeria	6	44	0	Disc diffusion
Pourakbari	2012	2016	Asia	Iran	6	45	7	Disc diffusion
Nagaveni	2011	2020	Asia	India	6	45	5	Disc diffusion
Emami	2016 to 2017	2019	Asia	Iran	7	46	7	Disc diffusion
Park	2011 to 2012	2016	Asia	South Korea	6	47	0	Disc diffusion
Emami	2017 to 2018	2020	Asia	Iran	9	48	0	Disc diffusion
Khorvash		2017	Asia	Iran	8	48	22	Disc diffusion
Al-kaffas	2021 to 2021	2022	Asia	Egypt	8	49	44	Disc diffusion
AL-Shimmary	2015 to 2016	2016	Asia	Iraq	4	50	19	Disc diffusion
Abed	2020	2021	Asia	Iraq	7	50	0	Disc diffusion
Askora		2022	Africa	Egypt	7	50	9	Disc diffusion
Fakhkhari	2012 to 2016	2020	Asia	Iran	4	51	14	Disc diffusion
Nedeljkovi	2012	2015	Europe	Serbia	7	53	0	Disc diffusion
Odumosu	2010	2012	Africa	Nigeria	7	54	1	Disc diffusion
Jamalifar		2019	Asia	Iran	6	54	17	Disc diffusion
Mansour	2009 to 2010	2014	Asia	Saudi Arabia	6	54	0	Disc diffusion
Gomila	2010	2013	Europe	Spain	6	56	1	Disc diffusion
WADHWA		2016	Asia	India	6	57	0	Disc diffusion
Kovacevic	2017	2019	Europe	Bosnia and Herzegovina	6	58	23	Disc diffusion
Karamia	2017 to 2017	2019	Asia	Iran	9	58	0	Disc diffusion
Mansour	2010 to 2010	2013	Africa	Egypt	6	59	0	Disc diffusion
Bourgi	2014 to 2018	2020	Asia	Lebanon	4	59	3	Disc diffusion
Kashfi	2014 to 2015	2017	Asia	Iran	6	60	0	Disc diffusion
Y. Al Dawodeyah	2014 to 2015	2018	Asia	Jordan	5	61	0	Disc diffusion
Parchand	2006 to 2018	2020	Europe	Helsinki	7	62	5	Disc diffusion
Vata	2011 and 2016	2018	Europe	Romania	7	62	0	Disc diffusion
Namdari	2016 to 2019	2021	Asia	Iran	8	66	0	Disc diffusion
Kombade	2018 to 2018	2021	Asia	India	6	67	0	Disc diffusion
Tahmasebi	2018 to 2019	2020	Asia	Iran	8	69	10	Disc diffusion
Dogonchia	2016 to 2017	2017	Asia	Iran	8	71	5	Disc diffusion
Faghri	2016	2018	Asia	Iran	8	72	0	Disc diffusion
Khudair	2018 to 2019	2020	Asia	Iraq	7	72	29	Disc diffusion
ADAIMÉ	2015 to 2016	2020	Asia	Lebanon	7	72	1	Disc diffusion
Sarwat		2021	Asia	India	5	74	0	Disc diffusion
Qadeer	2015 to 2016	2016	Asia	pakistan	7	74	5	Disc diffusion
El-din	2020 to 2022	2022	Africa	Egypt	8	75	18	Disc diffusion
Bahador	2017 to 2017	2019	Asia	Iran	8	75	1	Disc diffusion
Samonis	2008	2010	Europe	Greece	7	79	1	Disc diffusion
López-Causapé		2017	Europe	spain	3	79	3	Disc diffusion
Meradji	2012 to 2013	2015	Africa	Algeria	5	80	20	Disc diffusion
Talebi	2016 to 2017	2019	Asia	Iran	5	80	0	Disc diffusion
Morteza		2019	Asia	Iran		80	19	Disc diffusion
Izadi Pour Jahromi	2015 to 2016	2018	Asia	Iran	9	80	2	Disc diffusion
Alkhulaifi	2021 to 2022	2022	Asia	Iraq	5	81	7	Disc diffusion
Nejma	2014 to 2015	2018	Africa	Tunisia	7	81	0	Disc diffusion
Mahar	2017 to 2017	2020	Asia	Pakistan	5	85	7	Disc diffusion
Manikandan	2014 to 2016	2020	Asia	India	6	86	0	Disc diffusion
Saderi	2013	2015	Asia	Iran	6	88	8	Disc diffusion
Saleem	2017 to 2018	2019	Asia	Pakistan	7	88	21	Disc diffusion
Sefraoui	2009 to 2012	2014	Africa	Algeria	5	89	0	Disc diffusion
Memar		2016	Asia	Iran	5	90	0	Disc diffusion
Akram		2021	Asia	Pakistan	5	90	9	Disc diffusion
KO£ODZIEJ	1996 to 2000	2006	Europe	Poland	7	90	0	Disc diffusion
BEHERA		2017	Asia	India	6	92	15	Disc diffusion
Saffari	2014 to 2015	2017	Asia	Iran	5	92	53	Disc diffusion
Khoshnood	2017	2019	Asia	Iran	6	93	0	Disc diffusion
Khosravi	2016 to 2016	2017	Asia	Iran	8	93	0	Disc diffusion
Fekri Kohan	2018 to 2019	2020	Asia	Iran	5	94	26	Disc diffusion
Mohanty	2011	2013	Asia	India	7	95	8	Disc diffusion
SHaran	2014 to 2016	2016	Asia	India	6	95	0	Disc diffusion
Mohammadzadeh	2014 to 2016	2017	Asia	Iran	8	95	0	Disc diffusion
Nwabuisi	1998 to 1999	2002	Africa	Nigeria	7	96	5	Disc diffusion
Nodoushan	2015	2019	Asia	Iran	7	96	8	Disc diffusion
Ghasemian Safaei	2015 to 2015	2017	Asia	Iran	5	96	8	Disc diffusion
Al-Khudhairy	2017 to 2018	2020	Asia	Iraq	4	97	0	Disc diffusion
Jazani		2012	Asia	Iran	6	100	68	Disc diffusion
Bazgir	2018 to 2019	2021	Asia	Iran	5	100	26	Disc diffusion
Goli	2014	2017	Asia	Iran	7	100	12	Disc diffusion
Golia	2014 to 2014	2017	Asia	Iran	6	100	2	Disc diffusion
MACIN		2017	Asia	Turkey	7	100	0	Disc diffusion
Goli	2014 to 2014	2016	Asia	Iran	8	100	2	Disc diffusion
Eladawy		2021	Africa	Egypt	6	103	0	Disc diffusion
Souza	2011 to 2012	2014	Asia	India	7	106	0	Disc diffusion
Bono	2009 to 2013	2015	Europe	Italy	6	107	0	Disc diffusion
Parsa	2017 to 2018	2020	Asia	Iran	7	107	0	Disc diffusion
CIPRIANO	2000 to2003	2007	South America	Brazil	7	108	0	Disc diffusion
Chauhan	2021 to 2022	2022	Asia	India	7	110	17	Disc diffusion
Kakhandki	2019	2020	Asia	India	6	117	91	Disc diffusion
Khan	2020 to 2020	2023	Asia	Pakistan	7	117	1	Disc diffusion
C. Gutiérrez‑Santana	2015 to 2019	2022	America	Mexico	6	118	0	Disc diffusion
Taleb	2021 to 2021	2023	Asia	Palestine	6	118	4	Disc diffusion
KİRAC	2015	2018	Asia	Turkey	6	120	5	Disc diffusion
Carroll		2004	Oceania	Australia	7	123	3	Disc diffusion
M. Ghanem		2022	Asia	Egypt	9	125	75	Disc diffusion
Defaee	2009	2019	Asia	Iran	8	129	48	Disc diffusion
Mirbagheri	2011 to 2012	2015	Asia	Iran	6	131	0	Disc diffusion
Mohammadi Barzelighi		2020	Asia	Iran	7	133	0	Disc diffusion
Chinedu	2002	2005	Africa	Nigeria	6	137	22	Disc diffusion
Ahmed	2020	2022	Asia	Pakistan	6	142	5	Disc diffusion
Pournajaf	2016 to 2017	2018	Asia	Iran	5	143	0	Disc diffusion
Sangale		2021	Asia	India	8	145	1	Disc diffusion
Khosravi	2014 to 2014	2016	Asia	Iran	6	148	0	Disc diffusion
Wemambu	1980 to 1981	1983	Africa	Nigeria	6	149	26	Disc diffusion
Farhan		2019	Africa	Egypt	7	150	43	Disc diffusion
LOCKWOOD		1973	North America	USA	5	150	4	Disc diffusion
Najafi	2013 to 2014	2015	Asia	Iran	7	150	8	Disc diffusion
Radan	2013 to 2014	2015	Asia	Iran	6	150	0	Disc diffusion
UZUN	2010 to 2011	2014	Asia	Turkey	5	157	0	Disc diffusion
Azimi	2013 to 2014	2016	Asia	Iran	6	160	2	Disc diffusion
Abulzahra	2018 to 2019	2020	Asia	Iraq	6	163	15	Disc diffusion
Rodulfo	2009 to 2016	2019	America	Venezuela	5	176	0	Disc diffusion
Behbahani	2017 to 2018	2019	Asia	Iran	8	180	6	Disc diffusion
Taleb	2019 to 2019	2023	Asia	Palestine	6	184	9	Disc diffusion
Ali	2014 to 2016	2021	Asia	Pakistan	7	187	47	Disc diffusion
Al-Agamy	2010	2012	Asia	Saudi Arabia	6	200	0	Disc diffusion
Nigeria	2013 to 2015	2018	Africa	Nigeria	7	200	32	Disc diffusion
Qureshi	2017	2018	Asia	Pakistan	7	200	0	Disc diffusion
Mobaraki	2015 to 2016	2018	Asia	Iran	8	200	6	Disc diffusion
Azimi		2016	Asia	Iran	5	203	0	Disc diffusion
Llanes	2006 to 2007	2013	Europe	France	7	204	0	Disc diffusion
Zaheer	2012 to 2013	2015	Asia	Pakistan	6	204	3	Disc diffusion
Sharifi	2013 to 2014	2019	Asia	Iran	7	208	0	Disc diffusion
Sheikh	2011 to 2012	2014	Asia	Iran	7	223	0	Disc diffusion
Bangera	2012 to 2014	2016	Asia	India	3	224	0	Disc diffusion
Sarhangi	2011 to 2012	2013	Asia	Iran	6	240	15	Disc diffusion
Mahmoud	2019 to 2020	2017	Asia	Egypt	8	241	49	Disc diffusion
Oncul	2001 to 2012	2014	Asia	Turkey	5	241	0	Disc diffusion
Wattal		2014	Asia	India	6	246	0	Disc diffusion
Tarashi	2012 to 2015	2016	Asia	Iran	7	309	1	Disc diffusion
Wang	2017 to 2019	2020	Asia	China	6	329	53	Disc diffusion
Hong		2015	Asia	Korea	7	329	0	Disc diffusion
Chen	2010 to 2012	2014	Asia	China	6	368	5	Disc diffusion
Shahcheraghi	2005 to 2007	2010	Asia	Iran	7	610	0	Disc diffusion
Manno	1993 to 1997	2005	Europe	Italy	6	1315	0	Disc diffusion
Li	2016 to 2022	2023	Asia	China	9	3301	6	Disc diffusion
Kidd	2007 to 2008.	2009	Oceania	Australia	7	58	10	disk diffusion
Nojookambari	2015 to 2016	2019	Asia	Iran	7	100	0	disk diffusion
Tehrani	2017 to 2018	2019	Asia	Iran	8	8	0	E test
Japoni	2008 to 2009	2011	Asia	Japoni	7	9	0	E test
Cuzon	2006 to 2010	2011	America	Colombia	7	10	0	E test
Lee	2004 to 2005	2011	Asia	Taiwan	7	11	5	E test
Samonis	2009 to 2010	2012	Europe	Greece	6	15	0	E test
Malekzadegan		2019	Asia	Iran	6	21	0	E test
QURESHI	2013	2017	Asia	Pakistan	8	22	2	E test
Elshafie	2002 to 2003	2007	Asia	Qatar	6	23	0	E test
Mostafa	2018 to 2019	2022	Africa	Egypt	7	32	2	E test
Cabrera	2017 to 2020	2022	Europe	Spain	5	43	0	E test
Somily	2007 to 2008	2010	Asia	Saudi Arabia	8	43	7	E test
YOUSEFI	2007 to 2008	2012	Asia	Iran	6	47	7	E test
Schechner	2006 to 2008	2011	Asia	Israel	7	52	0	E test
Renata	2006	2010	South America	Brazil	8	69	2	E test
Tahmasebi	2018 to 2019	2020	Asia	Iran	7	69	10	E test
Delroshan	2020 to 2021	2023	Asia	Iran	7	70	0	E test
Tahmasebi	2018 to 2019	2020	Asia	Iran	8	73	0	E test
Al-Kabsi	2009 to 2010	2011	Asia	Malaysia	7	88	7	E test
Causape	2003 to 2010	2013	Europe	Spain	6	100	7	E test
Dong		2012	Asia	Taiwan	5	100	5	E test
Petrova	2005 to 2014	2016	Europe	Bulgaria	7	102	0	E test
Dehbashi	2015 to 2016	2018	Asia	Iran	8	105	0	E test
TU MBARELLO	2006 to 2007.	2011	Europe	Italy	7	106	0	E test
Tumbarello	2008 to 2010	2013	Europe	Italy	6	110	0	E test
Galani	2004 to 2006	2008	Europe	Greece	6	124	8	E test
Azimi	2015 to 2016	2018	Asia	Iran	8	160	0	E test
Alam	2017 to 2018	2020	Asia	India	3	200	7	E test
Zerouali	2010 to 2011	2014	Africa		7	414	0	E test
